# Supplementary material
Source: PubMed Central journal article supplement (PMC3702678)
Supplement: NIHMS432002-supplement-02.pdf [file NIHMS432002-supplement-02.pdf]

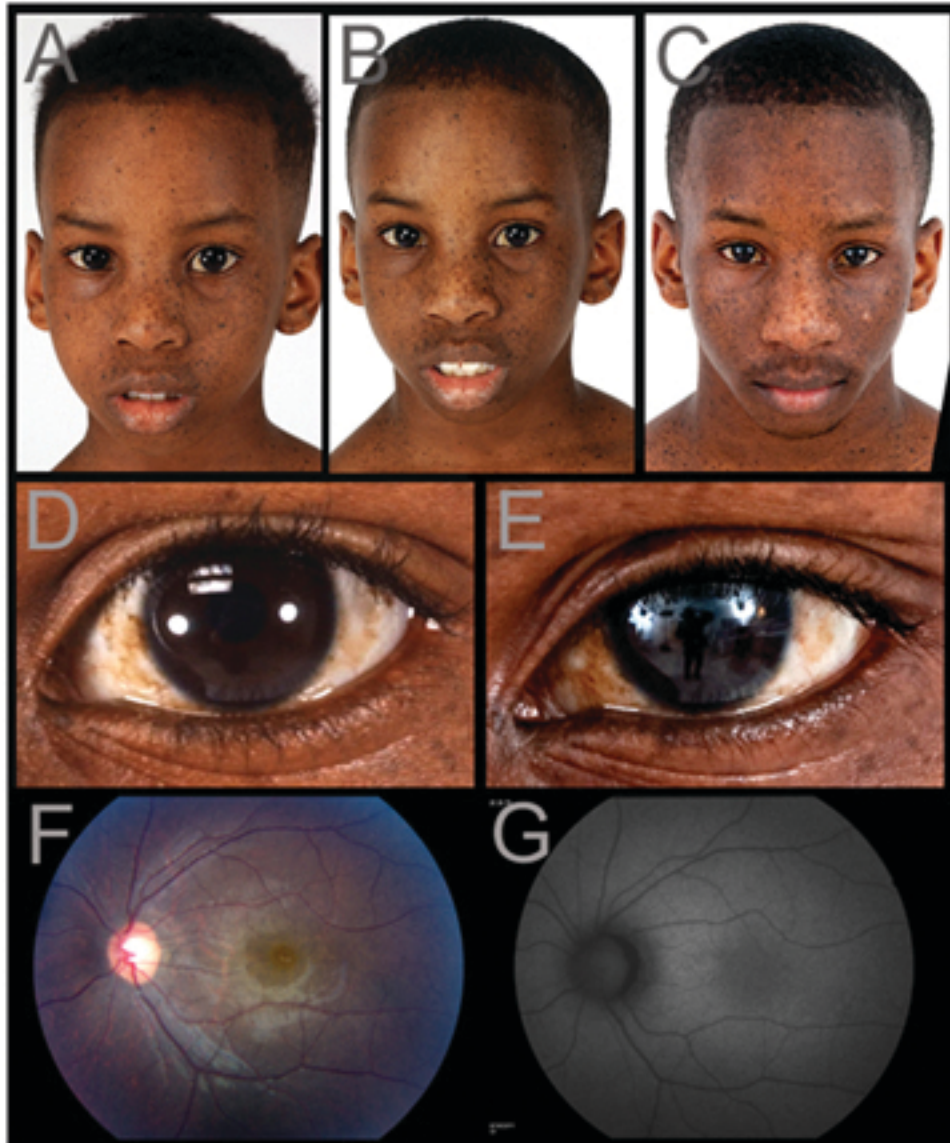

**Figure 4: Recent re-classification of a patient from Xeroderma pigmentosum (XP) to XP/Cockayne syndrome complex via information obtained during an ophthalmic exam.**

All photos in this figure are Case 7, African American XP-G patient (XP218BE), shown at (A) age 10, (B) age 13 and (C) age 17 years. Conjunctival melanosis OS (left eye) is shown at ages 10 (D) and 17 (E). Until visit at age 17, this patient had been classified as XP, however subtle fundus abnormalities observed during that examination (macular granularity with a few yellowish dots and mild arteriolar attenuation) led to further testing. Fundus image (F) and fundus autofluorescence image (G) from patient at age 17. Static autofluorescence imaging shows diffuse central hyperautofluorescence and is suggestive of increased macular lipofuscin accumulation, given the patient's age. Full-field electroretinogram (ERG) was abnormal (e.g., dark-adapted maximum combined response a wave amplitude = 125-146  $\mu\text{V}$  [normal > 188  $\mu\text{V}$ ], b wave amplitude = 236-279  $\mu\text{V}$  [normal > 373  $\mu\text{V}$ ], and cone flicker amplitude 52-63  $\mu\text{V}$  = [normal > 101  $\mu\text{V}$ ]), suggestive of early cone-rod degeneration. The patient also had corneal thickening and specular microscopy abnormalities.
